# Supplementary material for: The Varietal Influence of Flavour Precursors from Grape Marc on Monoterpene and C13-Norisoprenoid Profiles in Wine as Determined by Membrane-Assisted Solvent Extraction (MASE) GC-MS
Source: MDPI journal article supplement (doi:10.3390/molecules27072046), 2022-03-22
Supplement: s1 [file s1]

Supplementary materials for

**The varietal influence of flavour precursors from grape marc on monoterpene and C<sub>13</sub>-norisoprenoid profiles in wine as determined by membrane-assisted solvent extraction (MASE) GC-MS**

Lisa Pisaniello, Flynn Watson, Tracey Siebert, Leigh Francis and Josh Hixson

Table S1: Red wine calibration and validation data for membrane-assisted solvent extraction (MASE) GC-MS method, as determined in duplicate in commercially available Shiraz (2018, 13.5% alcohol) or Pinot Noir (2017, 13.0% alcohol).

| Analyte                  | Retention time (mins) | Internal standard             | Ions monitored (m/z) |                      | R <sup>2</sup> | Linearity         |           | Limits (µg/L) |  | Low Spike (n = 7) |                       | High Spike (n = 7) |                       |
|--------------------------|-----------------------|-------------------------------|----------------------|----------------------|----------------|-------------------|-----------|---------------|--|-------------------|-----------------------|--------------------|-----------------------|
|                          |                       |                               | Quantifier           | Qualifiers (%)       |                | Range (µg/L)      | Detection | Quantitation  |  | Recovery (%)      | Repeatability (RSD %) | Recovery (%)       | Repeatability (RSD %) |
| Limone                   | 13.86                 | d <sub>6</sub> -1,8-Cineole   | 136                  | 93 (230), 68 (255)   | 0.993          | 0, 0.5 - 100 µg/L | 0.03      | 0.11          |  | 93.0              | 4.8                   | 89.8               | 4.2                   |
| 1,8-Cineole              | 14.41                 |                               | 111                  | 154 (13), 126 (128)  | 0.9997         | 0, 0.5 - 100 µg/L | 0.03      | 0.1           |  | 100.1             | 2.5                   | 100.0              | 0.7                   |
| Terpinoline              | 15.55                 | d <sub>6</sub> -Linalool      | 136                  | 121 (106), 105 (28)  | 0.99           | 0, 0.5 - 100 µg/L | 0.01      | 0.03          |  | 91.0              | 7.3                   | 90.4               | 7.2                   |
| Linalool                 | 15.73                 |                               | 71                   | 136 (40), 121 (19)   | 0.9989         | 0, 0.5 - 100 µg/L | 0.04      | 0.14          |  | 97.8              | 6.0                   | 100.6              | 1.6                   |
| <i>cis</i> -Rose oxide   | 16.18                 | d <sub>6</sub> -α-Terpineol   | 139                  | 154 (14), 140 (10)   | 0.9946         | 0, 0.5 - 100 µg/L | 0.01      | 0.02          |  | 107.7             | 7.8                   | 104.0              | 6.5                   |
| <i>trans</i> -Rose oxide | 16.8                  |                               | 139                  | 154 (10), 140 (11)   | 0.9942         | 0, 0.5 - 100 µg/L | 0.01      | 0.03          |  | 106.9             | 8.3                   | 107.7              | 6.5                   |
| α-Terpineol              | 19.41                 |                               | 136                  | 93 (110), 59 (114)   | 0.9999         | 0, 0.5 - 100 µg/L | 0.1       | 0.35          |  | 104.8             | 8.5                   | 101.8              | 1.3                   |
| β-Citronellol            | 19.49                 | d <sub>2</sub> -β-Citronellol | 123                  | 156 (38), 69 (440)   | 0.9939         | 0, 0.5 - 100 µg/L | 0.11      | 0.37          |  | 104.0             | 4.8                   | 98.1               | 2.6                   |
| Nerol                    | 19.85                 |                               | 139                  | 154 (48), 121 (4200) | 0.995          | 0, 10 - 100 µg/L  | 0.87      | 2.89          |  | 96.0              | 9.5                   | 106.6              | 2.3                   |
| Geraniol                 | 20.62                 | d <sub>7</sub> -Geraniol      | 136                  | 93 (440), 123 (400)  | 0.9845         | 0, 10 - 100 µg/L  | 1.49      | 4.98          |  | 99.6              | 4.8                   | 100.6              | 3.0                   |
| β-Damascenone            | 25.43                 | d <sub>4</sub> -β-Damascenone | 69                   | 190 (36), 175 (16)   | 0.9992         | 0, 0.1 - 100 µg/L | 0         | 0.01          |  | 96.5              | 1.6                   | 103.1              | 2.5                   |
| α-Ionone                 | 26.21                 | d <sub>3</sub> -α-Ionone      | 136                  | 121 (125), 93 (210)  | 0.9993         | 0, 0.1 - 100 µg/L | 0.15      | 0.5           |  | 104.7             | 4.4                   | 101.7              | 1.4                   |
| β-Ionone                 | 28.15                 | d <sub>3</sub> -β-Ionone      | 177.1                | 192 (13), 43 (6)     | 0.9982         | 0, 0.1 - 100 µg/L | 0.01      | 0.02          |  | 85.1              | 3.0                   | 101.4              | 1.0                   |

Table S2: Geraniol glucoside, monoterpene pentosyl-glucoside (MT PGs) and monoterpene rhamnosyl-glucoside (MT RGs) concentrations in Chardonnay wine with and without a 0.4 g/L addition of Muscat Gordo marc extract, analysed periodically over 154 days of storage at 15 °C.

| Sample             | Replicate | Days of storage    |         |         |                    |         |         |                    |         |         |                    |         |         |                    |         |         |
|--------------------|-----------|--------------------|---------|---------|--------------------|---------|---------|--------------------|---------|---------|--------------------|---------|---------|--------------------|---------|---------|
|                    |           | 41                 |         |         | 64                 |         |         | 99                 |         |         | 126                |         |         | 154                |         |         |
|                    |           | Geraniol glucoside | MT PGs* | MT RGs* | Geraniol glucoside | MT PGs* | MT RGs* | Geraniol glucoside | MT PGs* | MT RGs* | Geraniol glucoside | MT PGs* | MT RGs* | Geraniol glucoside | MT PGs* | MT RGs* |
| Chardonnay Control | 1         | 18.07              | 4.75    | < LOD^  | 16.80              | 4.80    | < LOD   | 21.36              | 4.31    | < LOD   | 18.86              | 4.59    | < LOD   | 19.64              | 5.10    | < LOD   |
|                    | 2         | 16.31              | 4.90    | < LOD   | 17.48              | 5.33    | < LOD   | 21.89              | 4.77    | < LOD   | 19.50              | 4.57    | < LOD   | 20.01              | 5.11    | < LOD   |
|                    | 3         | 18.38              | 4.85    | < LOD   | 17.46              | 5.30    | < LOD   | 19.67              | 4.59    | < LOD   | 18.67              | 4.67    | < LOD   | 21.34              | 5.01    | < LOD   |
| Chardonnay Spiked  | 1         | 517.15             | 143.24  | 24.18   | 583.24             | 138.20  | 23.87   | 628.97             | 125.40  | 22.54   | 722.64             | 115.73  | 23.01   | 736.87             | 108.89  | 21.17   |
|                    | 2         | 526.63             | 142.06  | 23.93   | 605.33             | 133.93  | 23.15   | 626.11             | 124.37  | 23.53   | 676.16             | 114.74  | 21.55   | 742.54             | 103.81  | 21.23   |
|                    | 3         | 503.53             | 142.01  | 23.36   | 596.38             | 139.75  | 24.27   | 664.97             | 129.25  | 24.29   | 719.01             | 115.14  | 22.34   | 745.18             | 111.01  | 22.84   |

\* Determined using deuterated syringol gentiobioside as an internal standard, quoted in syringol gentiobioside equivalents.

<sup>^</sup> Limit of detection (LOD) for monoterpene rhamnose-glucoses (MT RGs) was 0.29 µg/L. Replacement value for samples '< LOD' was 0.14 µg/L.

Table S3: Concentration of selected monoterpenes and C<sub>13</sub>-norisoprenoids in Chardonnay wine with and without a 0.4 g/L addition of Muscat Gordo marc extract, analysed periodically over 154 days of storage at 15 °C.

| 41 Days of storage                                                                            |           |          |             |             |          |                |                  |             |               |        |          |                 |       |               |          |          |              |
|-----------------------------------------------------------------------------------------------|-----------|----------|-------------|-------------|----------|----------------|------------------|-------------|---------------|--------|----------|-----------------|-------|---------------|----------|----------|--------------|
| Concentration (µg/L)                                                                          |           |          |             |             |          |                |                  |             |               |        |          |                 |       |               |          |          |              |
| Sample                                                                                        | Replicate | Limonene | 1,8-Cineole | Terpinolene | Linalool | cis-Rose Oxide | trans-Rose Oxide | α-Terpineol | β-Citronellol | Nerol  | Geraniol | cis-Vitispirane | TDN   | β-Damascenone | α-Ionone | β-Ionone | Wine Lactone |
| Chardonnay Control                                                                            | 1         | <LOQ     | <LOQ        | <LOD        | <LOD     | <LOD           | <LOD             | 5.017       | <LOD          | <LOD   | <LOQ     | 0.263           | 0.624 | <LOQ          | <LOD     | 0.106    | <LOD         |
|                                                                                               | 2         | <LOQ     | <LOQ        | <LOD        | <LOQ     | <LOD           | <LOD             | 5.234       | <LOQ          | <LOD   | <LOQ     | 0.289           | 0.371 | <LOQ          | <LOD     | 0.086    | <LOD         |
|                                                                                               | 3         | <LOQ     | <LOQ        | <LOD        | <LOQ     | <LOD           | <LOD             | 5.119       | <LOQ          | <LOD   | <LOQ     | 0.394           | 0.422 | <LOQ          | <LOD     | 0.068    | <LOD         |
| Chardonnay Spiked                                                                             | 1*        | -        | -           | -           | -        | -              | -                | -           | -             | -      | -        | -               | -     | -             | -        | -        | -            |
|                                                                                               | 2         | 0.806    | <LOQ        | <LOQ        | 257.951  | 0.229          | 0.075            | 105.6       | <LOD          | 11.26  | 50.76    | 0.631           | 0.540 | 2.618         | <LOD     | 0.103    | <LOD         |
|                                                                                               | 3         | 0.761    | <LOQ        | <LOQ        | 263.997  | 0.245          | 0.082            | 108.1       | <LOQ          | 9.066  | 40.75    | 0.552           | 0.455 | 2.672         | <LOQ     | 0.106    | <LOD         |
| Limit of Quantitation (LOQ, µg/L) <sup>^</sup>                                                |           | 0.113    | 0.286       | 0.933       | 11.320   |                |                  |             | 8.227         |        | 5.862    |                 |       | 1.104         | 0.111    |          |              |
| Limit of Detection (LOD, µg/L) <sup>^</sup>                                                   |           | 0.034    | 0.086       | 0.280       | 3.395    | 0.025          | 0.021            |             | 2.468         | 1.623  | 1.758    |                 |       | 0.331         | 0.033    |          | 2.033        |
| < LOQ replacement value <sup>†</sup>                                                          |           | 0.073    | 0.186       | 0.607       | 7.358    |                |                  |             | 5.348         |        | 3.810    |                 |       | 0.718         | 0.072    |          |              |
| < LOD replacement value <sup>‡</sup>                                                          |           | 0.017    | 0.043       | 0.140       | 1.698    | 0.013          | 0.011            |             | 1.234         | 0.812  | 0.879    |                 |       | 0.166         | 0.017    |          | 1.017        |
| * Analysis of Spiked Chardonnay Replicate 1 failed for 'Day 41' samples and provided no data. |           |          |             |             |          |                |                  |             |               |        |          |                 |       |               |          |          |              |
| 64 Days of storage                                                                            |           |          |             |             |          |                |                  |             |               |        |          |                 |       |               |          |          |              |
| Concentration (µg/L)                                                                          |           |          |             |             |          |                |                  |             |               |        |          |                 |       |               |          |          |              |
| Sample                                                                                        | Replicate | Limonene | 1,8-Cineole | Terpinolene | Linalool | cis-Rose Oxide | trans-Rose Oxide | α-Terpineol | β-Citronellol | Nerol  | Geraniol | cis-Vitispirane | TDN   | β-Damascenone | α-Ionone | β-Ionone | Wine Lactone |
| Chardonnay Control                                                                            | 1         | 0.032    | 0.060       | 0.175       | 7.352    | 0.020          | <LOD             | 5.142       | 2.346         | <LOD   | <LOQ     | 0.402           | 0.052 | 1.243         | <LOD     | 0.042    | <LOQ         |
|                                                                                               | 2         | 0.031    | 0.066       | 0.176       | 7.569    | <LOQ           | <LOD             | 5.094       | 2.177         | <LOD   | <LOQ     | 0.374           | 0.063 | 1.237         | <LOD     | 0.045    | <LOQ         |
|                                                                                               | 3         | 0.026    | 0.061       | 0.210       | 7.951    | 0.020          | <LOD             | 5.221       | 1.803         | <LOD   | <LOQ     | 0.460           | 0.094 | 1.235         | <LOQ     | 0.040    | <LOQ         |
| Chardonnay Spiked                                                                             | 1         | 1.095    | 0.078       | 0.952       | 394.274  | 0.266          | 0.056            | 163.481     | <LOQ          | 14.932 | 63.365   | 1.150           | 0.220 | 3.764         | <LOQ     | 0.061    | <LOQ         |
|                                                                                               | 2         | 1.161    | 0.073       | 1.127       | 461.388  | 0.201          | 0.042            | 157.601     | <LOQ          | 11.431 | 72.651   | 0.776           | 0.167 | 3.811         | 0.065    | 0.096    | 0.307        |
|                                                                                               | 3         | 1.075    | 0.080       | 0.912       | 365.031  | 0.247          | 0.054            | 155.121     | <LOQ          | 11.257 | 54.528   | 1.121           | 0.220 | 3.423         | <LOQ     | 0.061    | <LOQ         |
| Limit of Quantitation (LOQ, µg/L) <sup>^</sup>                                                |           |          |             |             |          | 0.018          |                  |             | 1.795         |        | 1.262    |                 |       |               | 0.047    |          | 0.207        |
| Limit of Detection (LOD, µg/L) <sup>^</sup>                                                   |           |          |             |             |          | 0.005          | 0.004            |             | 0.539         | 0.693  | 0.379    |                 |       |               | 0.014    |          | 0.062        |
| < LOQ replacement value <sup>†</sup>                                                          |           |          |             |             |          | 0.012          |                  |             | 1.167         |        | 0.821    |                 |       |               | 0.031    |          | 0.135        |
| < LOD replacement value <sup>‡</sup>                                                          |           |          |             |             |          | 0.003          | 0.002            |             | 0.270         | 0.347  | 0.190    |                 |       |               | 0.007    |          | 0.031        |
| 99 Days of storage                                                                            |           |          |             |             |          |                |                  |             |               |        |          |                 |       |               |          |          |              |
| Concentration (µg/L)                                                                          |           |          |             |             |          |                |                  |             |               |        |          |                 |       |               |          |          |              |
| Sample                                                                                        | Replicate | Limonene | 1,8-Cineole | Terpinolene | Linalool | cis-Rose Oxide | trans-Rose Oxide | α-Terpineol | β-Citronellol | Nerol  | Geraniol | cis-Vitispirane | TDN   | β-Damascenone | α-Ionone | β-Ionone | Wine Lactone |
| Chardonnay Control                                                                            | 1         | <LOQ     | 0.152       | <LOD        | 4.496    | 0.020          | <LOD             | 5.646       | 2.803         | <LOQ   | <LOQ     | 0.355           | 0.039 | 1.046         | 0.351    | 0.015    | <LOD         |
|                                                                                               | 2         | <LOQ     | 0.143       | <LOD        | 4.659    | 0.021          | <LOD             | 5.064       | 2.510         | <LOQ   | <LOQ     | 0.312           | 0.039 | 1.064         | 0.346    | 0.014    | <LOD         |
|                                                                                               | 3         | <LOQ     | 0.147       | <LOD        | 4.211    | 0.022          | <LOD             | 4.310       | 2.516         | <LOQ   | <LOQ     | 0.336           | 0.058 | 0.955         | 0.369    | 0.023    | <LOQ         |
| Chardonnay Spiked                                                                             | 1         | 1.014    | 0.129       | 0.450       | 503.915  | 0.261          | 0.038            | 243.648     | 2.713         | 22.501 | 44.872   | 1.309           | 0.182 | 3.396         | 0.355    | 0.032    | <LOD         |
|                                                                                               | 2         | 1.117    | 0.185       | 0.568       | 606.665  | 0.262          | 0.038            | 265.290     | <LOQ          | 29.577 | 68.111   | 1.141           | 0.138 | 3.726         | 0.370    | 0.030    | <LOD         |
|                                                                                               | 3         | 1.192    | 0.143       | 0.620       | 555.144  | 0.294          | 0.043            | 242.506     | <LOQ          | 26.930 | 45.254   | 1.120           | 0.136 | 3.344         | 0.389    | 0.032    | <LOD         |
| Limit of Quantitation (LOQ, µg/L) <sup>^</sup>                                                |           | 0.118    |             |             |          |                |                  |             | 2.237         | 1.202  | 2.254    |                 |       |               |          |          | 0.173        |
| Limit of Detection (LOD, µg/L) <sup>^</sup>                                                   |           | 0.035    |             | 0.028       |          |                |                  |             | 0.671         | 0.361  | 0.676    |                 |       |               |          |          | 0.052        |
| < LOQ replacement value <sup>†</sup>                                                          |           | 0.076    |             |             |          |                |                  |             | 1.454         | 0.782  | 1.465    |                 |       |               |          |          | 0.113        |
| < LOD replacement value <sup>‡</sup>                                                          |           | 0.018    |             | 0.014       |          |                |                  |             | 0.336         | 0.181  | 0.338    |                 |       |               |          |          | 0.026        |

<sup>^</sup>LOD and/or LOQ only specified where samples are quoted below that limit, or for calculation of replacement values.

<sup>†</sup> Replacement value determined as mean of LOQ and LOD.

<sup>‡</sup> Replacement value determined as mean of LOD and zero.

Table S3 continued: Concentration of selected monoterpenes and C<sub>13</sub>-norisoprenoids in Chardonnay wine with and without a 0.4 g/L addition of Gordo marc extract, analysed periodically over 154 days of storage at 15 °C.

| 126 Days of storage                  |           |          |             |             |          |                |                  |             |               |        |          |                 |       |               |          |          |              |
|--------------------------------------|-----------|----------|-------------|-------------|----------|----------------|------------------|-------------|---------------|--------|----------|-----------------|-------|---------------|----------|----------|--------------|
| Concentration (µg/L)                 |           |          |             |             |          |                |                  |             |               |        |          |                 |       |               |          |          |              |
| Sample                               | Replicate | Limonene | 1,8-Cineole | Terpinolene | Linalool | cis-Rose Oxide | trans-Rose Oxide | α-Terpineol | β-Citronellol | Nerol  | Geraniol | cis-Vitispirane | TDN   | β-Damascenone | α-Ionone | β-Ionone | Wine Lactone |
| Chardonnay Control                   | 1         | < LOQ    | 0.096       | < LOD       | 5.217    | 0.015          | < LOD            | 5.637       | 4.473         | 0.741  | 1.684    | 0.520           | < LOD | 1.125         | < LOQ    | 0.030    | < LOD        |
|                                      | 2         | 0.056    | 0.136       | < LOD       | 5.128    | 0.018          | < LOD            | 5.838       | 3.964         | 0.751  | 1.600    | 0.581           | < LOD | 1.059         | < LOQ    | 0.027    | < LOD        |
|                                      | 3         | 0.053    | 0.112       | < LOD       | 5.278    | 0.015          | < LOD            | 5.597       | 4.207         | 0.606  | 1.971    | 0.503           | < LOD | 1.133         | < LOQ    | 0.030    | < LOD        |
| Chardonnay Spiked                    | 1         | 1.442    | 0.136       | 0.897       | 588.100  | 0.226          | 0.041            | 279.300     | 4.280         | 54.475 | 92.070   | 2.005           | 0.155 | 3.655         | < LOQ    | 0.055    | < LOD        |
|                                      | 2         | 1.488    | 1.488       | 0.696       | 560.400  | 0.234          | 0.037            | 279.750     | 4.015         | 45.850 | 87.385   | 1.969           | < LOQ | 3.674         | < LOQ    | 0.049    | < LOD        |
|                                      | 3         | 1.333    | 1.333       | 0.688       | 541.550  | 0.218          | 0.039            | 278.700     | 3.928         | 42.500 | 84.425   | 2.099           | 0.161 | 3.612         | < LOQ    | 0.042    | < LOD        |
| Limit of Quantitation (LOQ, µg/L)^   |           | 0.053    |             |             |          |                |                  |             |               |        |          |                 | 0.135 |               | 0.042    |          |              |
| Limit of Detection (LOD, µg/L)^      |           | 0.016    |             | 0.027       |          |                | 0.003            |             |               |        |          |                 | 0.041 |               | 0.012    |          | 0.097        |
| < LOQ replacement value <sup>†</sup> |           | 0.035    |             |             |          |                |                  |             |               |        |          |                 | 0.088 |               | 0.027    |          |              |
| < LOD replacement value <sup>‡</sup> |           | 0.008    |             | 0.014       |          |                | 0.002            |             |               |        |          |                 | 0.021 |               | 0.006    |          | 0.049        |

| 154 Days of storage                  |           |          |             |             |          |                |                  |             |               |        |          |                 |       |               |          |          |              |
|--------------------------------------|-----------|----------|-------------|-------------|----------|----------------|------------------|-------------|---------------|--------|----------|-----------------|-------|---------------|----------|----------|--------------|
| Concentration (µg/L)                 |           |          |             |             |          |                |                  |             |               |        |          |                 |       |               |          |          |              |
| Sample                               | Replicate | Limonene | 1,8-Cineole | Terpinolene | Linalool | cis-Rose Oxide | trans-Rose Oxide | α-Terpineol | β-Citronellol | Nerol  | Geraniol | cis-Vitispirane | TDN   | β-Damascenone | α-Ionone | β-Ionone | Wine Lactone |
| Chardonnay Control                   | 1         | < LOQ    | 0.172       | < LOD       | 6.387    | 0.047          | < LOQ            | 6.854       | 3.485         | 0.879  | 2.768    | 0.408           | < LOD | 1.261         | < LOQ    | 0.041    | < LOD        |
|                                      | 2         | < LOQ    | 0.167       | < LOQ       | 6.399    | 0.050          | < LOQ            | 6.650       | 2.732         | 1.080  | 2.435    | 0.422           | < LOD | 1.234         | < LOD    | 0.047    | < LOD        |
|                                      | 3         | < LOQ    | 0.163       | < LOQ       | 6.146    | 0.043          | < LOQ            | 6.547       | 3.098         | 0.770  | 2.133    | 0.460           | < LOD | 1.319         | < LOD    | 0.044    | < LOD        |
| Chardonnay Spiked                    | 1         | 1.096    | 0.175       | 1.112       | 724.550  | 0.301          | 0.051            | 375.000     | 2.783         | 72.340 | 124.900  | 1.786           | < LOD | 4.008         | < LOQ    | 0.062    | < LOD        |
|                                      | 2         | 1.054    | 0.195       | 1.172       | 750.250  | 0.297          | 0.055            | 369.950     | 2.396         | 80.745 | 138.850  | 1.772           | < LOD | 4.058         | < LOQ    | 0.055    | < LOD        |
|                                      | 3         | 1.011    | 0.910       | 1.048       | 709.350  | 0.323          | 0.058            | 373.650     | 2.723         | 74.155 | 123.850  | 1.859           | < LOD | 4.214         | < LOQ    | 0.060    | < LOD        |
| Limit of Quantitation (LOQ, µg/L)^   |           | 0.144    |             | 0.135       |          |                | 0.013            |             |               |        |          |                 |       |               | 0.073    |          |              |
| Limit of Detection (LOD, µg/L)^      |           | 0.043    |             | 0.040       |          |                | 0.004            |             |               |        |          |                 | 0.041 |               | 0.022    |          | 0.336        |
| < LOQ replacement value <sup>†</sup> |           | 0.094    |             | 0.088       |          |                | 0.009            |             |               |        |          |                 |       |               | 0.048    |          |              |
| < LOD replacement value <sup>‡</sup> |           | 0.022    |             | 0.020       |          |                | 0.002            |             |               |        |          |                 | 0.021 |               | 0.011    |          | 0.168        |

<sup>^</sup> LOD and/or LOQ only specified where samples are quoted below that limit, or for calculation of replacement values.

<sup>†</sup> Replacement value determined as mean of LOQ and LOD.

<sup>‡</sup> Replacement value determined as mean of LOD and zero.

Table S4: Grape samples collected and used to create marc extracts. Analysis of geraniol glucoside, monoterpene pentosyl-glucosides (MT PGs) and monoterpene rhamnosyl-glucosides (MT RGs) conducted via LC-MS/MS directly on juice or by dissolving approximately 20 mg of extract in 5 mL of water.

| Variety            | Type       | Processing masses (kg) |               |                | Juice volume (L) <sup>^</sup> | Mass of extract (g) | Extract yield Per marc weight (g/kg) | Per grape weight (g) | Extract analysis (µg/g of extract) |                      |         | Juice analysis (µg/L) |         |         |
|--------------------|------------|------------------------|---------------|----------------|-------------------------------|---------------------|--------------------------------------|----------------------|------------------------------------|----------------------|---------|-----------------------|---------|---------|
|                    |            | Grape weight           | Marc produced | Juice produced |                               |                     |                                      |                      | Geraniol glucoside                 | MT PGs*              | MT RGs* | Geraniol glucoside    | MT PGs* | MT RGs* |
| Muscat a PGB       | Floral     | 10.209                 | 4.369         | 5.840          | 5.458                         | 1.21                | 0.277                                | 0.119                | 1200.99                            | 121.08               | 74.66   | 122.52                | 335.69  | 47.56   |
| Viognier           | Floral     | 9.805                  | 5.112         | 4.693          | 4.386                         | 1.30                | 0.254                                | 0.133                | 216.66                             | 33.71                | < LOQ   | 20.90                 | 61.54   | 8.76    |
| Riesling           | Floral     | 10.046                 | 4.948         | 5.099          | 4.765                         | 0.81                | 0.164                                | 0.081                | 185.66                             | 33.26                | 9.78    | < LOD                 | 33.57   | 5.04    |
| Muscat Gordo       | Floral     | 10.223                 | 5.597         | 4.626          | 4.324                         | 1.45                | 0.259                                | 0.142                | 2082.21                            | 223.49               | 56.89   | 176.01                | 359.00  | 87.19   |
| Gerwurztraminer    | Floral     | 10.246                 | 4.890         | 5.356          | 5.005                         | 1.61                | 0.329                                | 0.157                | 1305.81                            | 52.48                | 24.36   | 998.13                | 118.35  | 14.68   |
| Chardonnay         | Non-floral | 9.581                  | 4.298         | 5.283          | 4.937                         | 1.48                | 0.344                                | 0.154                | < LOD <sup>#,‡</sup>               | < LOQ <sup>†,‡</sup> | < LOQ   | < LOD                 | 10.89   | < LOD   |
| Semillon           | Non-floral | 10.256                 | 4.439         | 5.817          | 5.437                         | 1.42                | 0.320                                | 0.138                | 44.60                              | 5.46                 | < LOQ   | < LOQ                 | 18.05   | < LOQ   |
| Verdelho           | Non-floral | 10.089                 | 4.449         | 5.640          | 5.271                         | 2.03                | 0.456                                | 0.201                | 27.43                              | < LOQ                | < LOQ   | 6.36                  | 55.95   | < LOQ   |
| Sauvignon Blanc    | Non-floral | 10.249                 | 4.222         | 6.027          | 5.633                         | 1.56                | 0.369                                | 0.152                | 85.00                              | 8.04                 | < LOQ   | < LOQ                 | 33.34   | 5.90    |
| Shiraz             | Non-floral | 9.966                  | 4.244         | 5.722          | 5.348                         | 2.14                | 0.504                                | 0.215                | 93.33                              | 6.83                 | < LOQ   | 82.09                 | 52.45   | 5.59    |
| Cabernet Sauvignon | Non-floral | 9.156                  | 4.535         | 4.621          | 4.319                         | 1.70                | 0.375                                | 0.186                | < LOQ                              | < LOQ                | < LOQ   | < LOD                 | 5.38    | < LOQ   |

<sup>^</sup> Juice volume calculated from weight using an average juice density of 1.07 kg/L.

\* Determined using deuterated syringol gentiobioside as an internal standard, quoted in syringol gentiobioside equivalents.

<sup>#</sup> Analytical limits for geraniol glucoside: LOQ 5.0 µg/L; LOD, 1.00 µg/L determined in solution of extracts or juice. Equates to roughly 25 and 5 µg/g of extract, respectively.

<sup>†</sup> Analytical limits for disaccharides: LOQ 1.0 µg/L and LOD 0.3 µg/L in dissolved extracts (Equates to roughly 5 and 1 µg/g of extract); LOQ 5.0 µg/L and LOD 1.7 µg/L in juice.

<sup>‡</sup> Replacement value for < LOQ samples was the mean of the LOQ and LOD. For < LOD samples, the mean of the LOD and zero, in the matrix analysed in (juice or dissolved extract).

Table S5: Analysis of selected monoterpenes and C<sub>13</sub>-norisoprenoids by GC-MS after hydrolysis of marc extracts at pH 1 and 100 °C for one hour. Marc extracts were dissolved in water at approximately 400 mg/L (20 mg in 5 mL water) and hydrolysed in singlicate.

| Variety            | Type       | Concentration after hydrolysis (µg/g of extract) |             |       |               |          |
|--------------------|------------|--------------------------------------------------|-------------|-------|---------------|----------|
|                    |            | Linalool                                         | α-Terpineol | TDN   | β-Damascenone | β-Ionone |
| Muscat a PGB       | Floral     | 437.6                                            | 766.5       | 63.1  | 53.1          | 10.7     |
| Viognier           | Floral     | 90.5                                             | 118.3       | 52.0  | 39.4          | 11.4     |
| Riesling           | Floral     | 213.8                                            | 256.6       | 421.2 | 112.3         | 10.5     |
| Muscat Gordo       | Floral     | 1909.0                                           | 1677.2      | 203.8 | 132.4         | 11.3     |
| Gerwurztraminer    | Floral     | 161.2                                            | 153.3       | 68.7  | 66.4          | < LOD*   |
| Chardonnay         | Non-floral | 13.1                                             | 20.1        | 75.5  | 102.5         | 11.5     |
| Semillon           | Non-floral | 62.8                                             | 43.3        | 120.2 | 79.4          | < LOD    |
| Verdelho           | Non-floral | 69.5                                             | 48.9        | 188.5 | 52.7          | 11.5     |
| Sauvignon Blanc    | Non-floral | 111.9                                            | 78.8        | 119.2 | 119.8         | 10.5     |
| Shiraz             | Non-floral | 34.5                                             | 30.8        | 130.5 | 72.1          | 12.0     |
| Cabernet Sauvignon | Non-floral | 35.0                                             | 26.7        | 92.5  | 106.7         | < LOD    |

\* Limit of Detection for β-ionone (5 µg/L) was determined in solution of hydrolysate and equates to roughly 2.6 µg/g of extract.  
Replacement value for '< LOD' samples was 2.5 µg/L in the analysis matrix.

Table S6: Concentration of marc extracts spiked into commercial Chardonnay wine, and calculated spike concentration of bound monoterpenes in the wines prior to storage.

| Sample                | Type       | Extract spike<br>(g/L) | Spiked concentration (µg/L) |                   |                   |
|-----------------------|------------|------------------------|-----------------------------|-------------------|-------------------|
|                       |            |                        | Geraniol glucoside          | MT PGs*           | MT RGs*           |
| 2016 Gewurztraminer ^ | Floral     | 0.401                  | 1002.50                     | -                 | -                 |
| Muscat a PGB          | Floral     | 0.396                  | 475.68                      | 47.95             | 29.57             |
| Viognier              | Floral     | 0.405                  | 87.74                       | 13.65             | 1.21 <sup>‡</sup> |
| Riesling              | Floral     | 0.402                  | 74.71                       | 13.38             | 3.94              |
| Muscat Gordo          | Floral     | 0.402                  | 836.75                      | 89.81             | 22.86             |
| Gerwurztraminer       | Floral     | 0.396                  | 517.56                      | 20.80             | 9.66              |
| Chardonnay            | Non-floral | 0.400                  | 0.80 <sup>†</sup>           | 0.20 <sup>‡</sup> | 1.20 <sup>‡</sup> |
| Semillon              | Non-floral | 0.404                  | 18.02                       | 2.21              | 1.21 <sup>‡</sup> |
| Verdelho              | Non-floral | 0.402                  | 11.02                       | 0.80 <sup>‡</sup> | 0.80 <sup>‡</sup> |
| Sauvignon Blanc       | Non-floral | 0.399                  | 33.95                       | 3.21              | 1.20 <sup>‡</sup> |
| Shiraz                | Non-floral | 0.403                  | 37.57                       | 2.75              | 1.21 <sup>‡</sup> |
| Cabernet Sauvignon    | Non-floral | 0.400                  | 5.20 <sup>‡</sup>           | 1.20 <sup>‡</sup> | 1.20 <sup>‡</sup> |

\* Determined using deuterated syringol gentiobioside as an internal standard, quoted in syringol gentiobioside equivalents.

^ Monoterpene disaccharides not determined in original analysis of this extract.

<sup>†</sup> Calculated from a value replacing a '< LOD' measurement.

<sup>‡</sup> Calculated from a value replacing a '< LOQ' measurement.

Table S7: Geraniol glucoside, monoterpene glucoside (MT Glu), monoterpene pentosyl-glucoside (MT PGs) and monoterpene rhamnosyl-glucoside (MT RGs) concentrations in control Chardonnay wine and Chardonnay wine with 0.4 g/L additions of marc extract from different varieties, analysed after 6-months of storage at 15 °C.

| Sample              | Type       | Replicate | Concentration (µg/L) |                     |                     |                     |
|---------------------|------------|-----------|----------------------|---------------------|---------------------|---------------------|
|                     |            |           | Geraniol glucoside   | MT Glu <sup>^</sup> | MT PGs <sup>*</sup> | MT RGs <sup>*</sup> |
| Control Wine        | Control    | 1         | 22.37                | 26.40               | 6.61                | < LOD <sup>#</sup>  |
|                     |            | 2         | 21.26                | 26.12               | 6.39                | < LOD               |
|                     |            | 3         | 21.66                | 27.06               | 4.35                | < LOD               |
| 2016 Gewurztraminer | Floral     | 1         | 1940.73              | 2158.38             | 154.11              | 53.13               |
|                     |            | 2         | 2071.00              | 2281.75             | 159.87              | 54.22               |
|                     |            | 3         | 2125.55              | 2355.50             | 162.07              | 53.70               |
| Muscat Gordo        | Floral     | 1         | 1513.99              | 1645.66             | 262.16              | 59.55               |
|                     |            | 2         | 1609.18              | 1752.16             | 259.44              | 58.82               |
|                     |            | 3         | 1626.13              | 1751.52             | 272.90              | 61.07               |
| Muscat a PGB        | Floral     | 1         | 968.99               | 1343.45             | 130.27              | 84.65               |
|                     |            | 2         | 1000.80              | 1342.32             | 136.91              | 88.30               |
|                     |            | 3         | 953.67               | 1318.94             | 128.58              | 82.14               |
| Riesling            | Floral     | 1         | 163.06               | 182.97              | 41.80               | 8.62                |
|                     |            | 2         | 133.18               | 148.46              | 32.42               | 7.00                |
|                     |            | 3         | 144.26               | 160.26              | 34.77               | 7.80                |
| Gewurztraminer      | Floral     | 1         | 731.66               | 818.37              | 67.09               | 17.80               |
|                     |            | 2         | 795.46               | 892.67              | 64.65               | 17.41               |
|                     |            | 3         | 764.12               | 860.21              | 63.90               | 16.37               |
| Viognier            | Floral     | 1         | 222.86               | 237.83              | 32.78               | 3.56                |
|                     |            | 2         | 152.46               | 165.89              | 23.87               | 2.09                |
|                     |            | 3         | 161.53               | 172.63              | 24.67               | 2.56                |
| Cabernet Sauvignon  | Non-floral | 1         | 32.78                | 39.18               | 7.48                | < LOQ               |
|                     |            | 2         | 29.33                | 34.76               | 6.00                | < LOQ               |
|                     |            | 3         | 28.78                | 34.02               | 6.54                | < LOQ               |
| Chardonnay          | Non-floral | 1         | 36.93                | 44.05               | 11.77               | < LOD               |
|                     |            | 2         | 37.05                | 44.51               | 12.62               | < LOQ               |
|                     |            | 3         | 37.61                | 45.20               | 12.84               | < LOQ               |
| Sauvignon Blanc     | Non-floral | 1         | 98.99                | 107.80              | 13.05               | 2.63                |
|                     |            | 2         | 98.95                | 106.73              | 13.23               | 2.72                |
|                     |            | 3         | 103.64               | 112.90              | 13.36               | 2.51                |
| Semillon            | Non-floral | 1         | 83.69                | 93.96               | 15.34               | 2.07                |
|                     |            | 2         | 81.26                | 88.02               | 15.65               | 1.95                |
|                     |            | 3         | 85.85                | 95.10               | 15.94               | 1.61                |
| Shiraz              | Non-floral | 1         | 95.78                | 105.77              | 18.53               | < LOQ               |
|                     |            | 2         | 95.44                | 105.83              | 18.11               | 1.45                |
|                     |            | 3         | 94.18                | 104.68              | 18.58               | 1.75                |
| Verdelho            | Non-floral | 1         | 61.75                | 69.01               | 13.45               | < LOQ               |
|                     |            | 2         | 55.24                | 63.96               | 12.63               | < LOQ               |
|                     |            | 3         | 52.09                | 59.78               | 11.64               | < LOQ               |

<sup>^</sup> Determined using deuterated geraniol glucoside as an internal standard, quoted in geraniol glucoside equivalents.

<sup>\*</sup> Determined using deuterated syringol gentiobioside as an internal standard, quoted in syringol gentiobioside equivalents.

<sup>#</sup> Analytical limits for MT RGs was: LOQ, 1.38 µg/L; LOD, 0.41 µg/L. Replacement values: < LOQ, 0.90 µg/L; < LOD, 0.21 µg/L.



Table S8: Concentration of selected monoterpenes and C<sub>13</sub>-norisoprenoids in control Chardonnay wine and Chardonnay wine with 0.4 g/L additions of marc extract from different varieties, analysed after 6-months of storage at 15 °C.

| Sample                               | Category   | Replicate | Concentration (µg/L) |             |             |          |                |                  |             |               |         |          |                 |       |               |          |          |       | Wine Lactone |
|--------------------------------------|------------|-----------|----------------------|-------------|-------------|----------|----------------|------------------|-------------|---------------|---------|----------|-----------------|-------|---------------|----------|----------|-------|--------------|
|                                      |            |           | Limonene             | 1,8-Cineole | Terpinolene | Linalool | cis-Rose Oxide | trans-Rose Oxide | a-Terpineol | b-Citronellol | Nerol   | Geraniol | cis-Vitispirane | TDN   | b-Damascenone | a-Ionone | b-Ionone |       |              |
| Control Wine                         | Control    | 1         | <LOQ                 | <LOQ        | <LOD        | 5.777    | 0.016          | <LOD             | 5.702       | 4.170         | <LOQ    | 2.161    | 0.112           | <LOD  | 1.398         | <LOD     | 0.032    | <LOD  |              |
|                                      |            | 2         | 0.168                | <LOQ        | <LOD        | 6.067    | <LOQ           | <LOD             | 5.640       | 4.163         | <LOQ    | 2.001    | 0.123           | <LOD  | 1.293         | <LOD     | 0.030    | <LOD  |              |
|                                      |            | 3*        | -                    | -           | -           | -        | -              | -                | -           | -             | -       | -        | -               | -     | -             | -        | -        | -     |              |
| 2016 Gewurztraminer                  | Floral     | 1         | <LOQ                 | <LOQ        | <LOD        | 41.419   | 0.170          | 0.025            | 31.891      | 2.895         | 5.249   | 12.854   | 1.100           | <LOD  | 7.520         | <LOQ     | 0.025    | <LOD  |              |
|                                      |            | 2         | 0.184                | <LOQ        | <LOD        | 39.382   | 0.146          | <LOQ             | 30.296      | 3.286         | 5.575   | 14.167   | 1.176           | <LOD  | 7.068         | <LOQ     | 0.029    | <LOD  |              |
|                                      |            | 3         | 0.197                | <LOQ        | <LOD        | 41.612   | 0.120          | <LOQ             | 29.777      | 2.817         | 4.192   | 12.613   | 1.480           | <LOD  | 7.429         | <LOQ     | 0.039    | <LOD  |              |
| Muscat Gordo                         | Floral     | 1         | 2.947                | 0.396       | 2.558       | 1732.692 | 0.586          | 0.092            | 977.289     | 12.015        | 158.374 | 840.459  | 2.087           | <LOD  | 16.128        | <LOQ     | 0.187    | <LOQ  |              |
|                                      |            | 2         | 3.076                | <LOQ        | 3.172       | 1762.440 | 0.551          | 0.082            | 902.861     | 12.380        | 139.209 | 719.649  | 2.460           | <LOQ  | 15.643        | <LOQ     | 0.193    | <LOQ  |              |
|                                      |            | 3         | 3.603                | 0.390       | 3.709       | 1736.587 | 0.558          | 0.082            | 929.243     | 11.311        | 135.572 | 720.433  | 2.148           | <LOQ  | 14.739        | <LOQ     | 0.185    | <LOD  |              |
| Muscat a PGB                         | Floral     | 1         | 1.198                | <LOQ        | 1.458       | 543.755  | 0.802          | 0.131            | 337.813     | 3.263         | 42.966  | 94.221   | 1.102           | <LOQ  | 7.702         | <LOQ     | 0.046    | <LOD  |              |
|                                      |            | 2         | 1.148                | <LOQ        | 1.253       | 567.739  | 0.756          | 0.126            | 350.511     | 3.859         | 44.499  | 101.725  | 1.008           | <LOD  | 7.438         | <LOQ     | 0.037    | <LOD  |              |
|                                      |            | 3         | 0.771                | <LOQ        | 0.793       | 570.537  | 0.705          | 0.113            | 321.542     | 4.030         | 41.704  | 101.361  | 0.935           | <LOD  | 7.049         | <LOD     | <LOQ     | <LOD  |              |
| Riesling                             | Floral     | 1         | 0.387                | <LOQ        | <LOQ        | 196.268  | 0.054          | <LOQ             | 120.595     | 2.770         | 14.158  | 33.353   | 3.641           | <LOQ  | 19.581        | <LOQ     | 0.154    | <LOQ  |              |
|                                      |            | 2         | 0.275                | <LOQ        | <LOQ        | 158.956  | 0.030          | <LOD             | 100.839     | 2.779         | 7.474   | 20.630   | 3.260           | <LOD  | 15.340        | <LOQ     | 0.126    | <LOD  |              |
|                                      |            | 3*        | -                    | -           | -           | -        | -              | -                | -           | -             | -       | -        | -               | -     | -             | -        | -        | -     |              |
| Gewurztraminer                       | Floral     | 1         | 0.214                | <LOQ        | <LOD        | 17.255   | 0.538          | 0.074            | 16.465      | 2.862         | 1.942   | 5.525    | 0.739           | <LOD  | 7.267         | <LOQ     | 0.051    | <LOD  |              |
|                                      |            | 2         | <LOQ                 | <LOQ        | <LOD        | 16.885   | 0.484          | 0.069            | 16.091      | 3.138         | 1.828   | 5.279    | 0.792           | <LOD  | 7.168         | <LOQ     | 0.048    | <LOD  |              |
|                                      |            | 3         | <LOQ                 | <LOQ        | <LOD        | 17.088   | 0.577          | 0.085            | 16.525      | 4.135         | 2.078   | 5.512    | 0.794           | <LOD  | 6.390         | <LOQ     | 0.029    | <LOQ  |              |
| Viognier                             | Floral     | 1         | 0.363                | <LOQ        | <LOQ        | 205.302  | 0.137          | 0.026            | 123.429     | 4.598         | 13.436  | 34.727   | 0.902           | <LOD  | 8.795         | <LOQ     | 0.123    | <LOQ  |              |
|                                      |            | 2         | 0.393                | <LOQ        | <LOQ        | 134.314  | 0.081          | <LOQ             | 79.168      | 2.765         | 8.976   | 26.266   | 0.727           | <LOD  | 6.097         | <LOQ     | 0.085    | <LOQ  |              |
|                                      |            | 3         | 0.368                | <LOQ        | <LOQ        | 135.268  | 0.108          | <LOQ             | 82.126      | 4.309         | 9.548   | 23.623   | 0.789           | <LOD  | 5.399         | <LOQ     | 0.095    | <LOD  |              |
| Cabernet Sauvignon                   | Non-floral | 1         | <LOQ                 | <LOQ        | <LOQ        | 6.141    | 0.022          | <LOD             | 8.037       | 2.665         | <LOQ    | 2.516    | 0.925           | <LOD  | 13.667        | <LOQ     | <LOQ     | <LOD  |              |
|                                      |            | 2         | 0.211                | <LOQ        | <LOD        | 5.730    | 0.021          | <LOD             | 8.074       | 2.629         | <LOQ    | 2.407    | 0.839           | <LOD  | 10.646        | <LOD     | 0.032    | <LOD  |              |
|                                      |            | 3         | <LOQ                 | <LOQ        | <LOD        | 6.155    | 0.023          | <LOD             | 8.284       | 2.737         | <LOQ    | 2.219    | 0.916           | <LOD  | 9.147         | <LOQ     | 0.043    | <LOD  |              |
| Chardonnay                           | Non-floral | 1         | <LOQ                 | <LOQ        | <LOD        | 11.765   | 0.023          | <LOD             | 11.537      | 2.385         | <LOQ    | 3.211    | 0.743           | <LOD  | 9.818         | <LOQ     | 0.058    | <LOD  |              |
|                                      |            | 2         | <LOQ                 | <LOQ        | <LOD        | 11.538   | 0.026          | <LOD             | 11.205      | <LOQ          | <LOQ    | 3.219    | 0.734           | <LOD  | 9.696         | <LOQ     | 0.066    | <LOD  |              |
|                                      |            | 3         | 0.198                | <LOQ        | <LOQ        | 12.343   | 0.027          | <LOD             | 11.560      | 2.526         | <LOQ    | 3.502    | 0.730           | <LOD  | 9.047         | <LOQ     | 0.063    | <LOD  |              |
| Sauvignon Blanc                      | Non-floral | 1         | <LOQ                 | <LOQ        | <LOD        | 9.496    | 0.041          | <LOQ             | 10.901      | 2.194         | <LOQ    | 3.167    | 1.218           | <LOD  | 12.320        | <LOQ     | 0.081    | <LOD  |              |
|                                      |            | 2         | <LOQ                 | <LOQ        | <LOD        | 8.884    | 0.042          | <LOD             | 11.215      | 2.967         | <LOQ    | 3.071    | 1.262           | <LOD  | 13.429        | <LOQ     | 0.070    | <LOD  |              |
|                                      |            | 3         | <LOQ                 | <LOQ        | <LOD        | 9.224    | 0.049          | <LOQ             | 10.772      | 2.658         | <LOQ    | 3.036    | 1.275           | <LOD  | 12.824        | <LOQ     | 0.046    | <LOD  |              |
| Semillon                             | Non-floral | 1         | <LOQ                 | <LOQ        | <LOQ        | 9.331    | 0.036          | <LOD             | 11.004      | 2.913         | <LOQ    | 3.043    | 1.245           | <LOD  | 9.195         | <LOQ     | 0.032    | <LOD  |              |
|                                      |            | 2         | <LOQ                 | <LOQ        | <LOD        | 8.603    | 0.023          | <LOD             | 10.099      | 2.356         | <LOQ    | 2.981    | 1.058           | <LOD  | 8.014         | <LOQ     | 0.029    | <LOD  |              |
|                                      |            | 3         | <LOQ                 | <LOQ        | <LOD        | 9.035    | 0.028          | <LOD             | 9.994       | 2.788         | <LOQ    | 2.670    | 1.426           | <LOD  | 7.472         | <LOQ     | 0.055    | <LOD  |              |
| Shiraz                               | Non-floral | 1         | <LOQ                 | <LOQ        | <LOD        | 7.857    | 0.035          | <LOD             | 9.081       | <LOQ          | <LOQ    | 2.581    | 1.010           | <LOD  | 7.076         | <LOQ     | 0.030    | <LOD  |              |
|                                      |            | 2         | <LOQ                 | <LOQ        | <LOD        | 7.880    | 0.030          | <LOQ             | 8.788       | <LOQ          | <LOQ    | 2.067    | 1.025           | <LOD  | 6.857         | <LOQ     | 0.038    | <LOD  |              |
|                                      |            | 3         | <LOQ                 | <LOQ        | <LOD        | 8.121    | 0.031          | <LOD             | 9.039       | 2.748         | 1.711   | <LOQ     | 1.012           | <LOD  | 6.293         | <LOQ     | 0.032    | <LOD  |              |
| Verdelho                             | Non-floral | 1         | 0.222                | <LOQ        | <LOQ        | 26.033   | 0.031          | <LOD             | 20.976      | <LOQ          | 2.201   | 4.918    | 0.964           | <LOD  | 3.205         | <LOQ     | 0.050    | <LOD  |              |
|                                      |            | 2         | 0.197                | <LOQ        | <LOQ        | 27.492   | 0.028          | <LOD             | 21.300      | <LOQ          | 2.800   | 5.158    | 0.989           | <LOD  | 3.179         | <LOQ     | 0.052    | <LOD  |              |
|                                      |            | 3         | 0.216                | <LOQ        | <LOQ        | 30.211   | 0.030          | <LOD             | 22.870      | <LOQ          | 2.834   | 3.863    | 0.991           | <LOD  | 3.716         | <LOD     | 0.052    | <LOD  |              |
| Limit of Quantitation (LOQ, µg/L)    |            |           | 0.167                | 0.299       | 0.389       | 0.803    | 0.014          | 0.020            | 0.561       | 2.031         | 1.569   | 1.881    | 0.043           | 1.065 | 0.072         | 0.104    | 0.023    | 0.954 |              |
| Limit of Detection (LOD, µg/L)       |            |           | 0.050                | 0.090       | 0.117       | 0.241    | 0.004          | 0.006            | 0.168       | 0.609         | 0.471   | 0.564    | 0.013           | 0.320 | 0.022         | 0.031    | 0.007    | 0.286 |              |
| < LOQ replacement value <sup>†</sup> |            |           | 0.109                | 0.194       | 0.253       | 0.522    | 0.009          | 0.013            | 0.365       | 1.320         | 1.020   | 1.222    | 0.028           | 0.693 | 0.047         | 0.067    | 0.015    | 0.620 |              |
| < LOD replacement value <sup>‡</sup> |            |           | 0.025                | 0.045       | 0.058       | 0.120    | 0.002          | 0.003            | 0.084       | 0.305         | 0.235   | 0.282    | 0.006           | 0.160 | 0.011         | 0.016    | 0.003    | 0.143 |              |

\* Analysis failed and provided no data. <sup>†</sup> Replacement value determined as mean of LOQ and LOD. <sup>‡</sup> Replacement value determined as mean of LOD and zero.

Table S9: Selected monoterpenes and C<sub>13</sub>-norisoprenoids in control Chardonnay wine and Chardonnay wine with 0.4 g/L additions of marc extract from different varieties after 6-months of storage at 15 °C. Data expressed as a proportion of the total volatile compounds analysed in the analytical suite.

| Sample              | Category   | Replicate | Proportion of total volatiles quantitated in analytical suite (%) |             |             |          |                |                  |             |               |       |          |                 |      |               |          |          |      | Wine Lactone |
|---------------------|------------|-----------|-------------------------------------------------------------------|-------------|-------------|----------|----------------|------------------|-------------|---------------|-------|----------|-----------------|------|---------------|----------|----------|------|--------------|
|                     |            |           | Limonene                                                          | 1,8-Cineole | Terpinolene | Linalool | cis-Rose Oxide | trans-Rose Oxide | α-Terpineol | β-Citronellol | Nerol | Geraniol | cis-Vitispirane | TDN  | β-Damascenone | α-Ionone | β-Ionone |      |              |
| Control Wine        | Control    | 1         | 0.52                                                              | 0.92        | 0.28        | 27.42    | 0.08           | 0.01             | 27.06       | 19.79         | 4.84  | 10.26    | 0.53            | 0.76 | 6.63          | 0.08     | 0.15     | 0.68 |              |
|                     |            | 2         | 0.80                                                              | 0.92        | 0.28        | 28.77    | 0.04           | 0.01             | 26.75       | 19.74         | 4.84  | 9.49     | 0.58            | 0.76 | 6.13          | 0.08     | 0.14     | 0.68 |              |
|                     |            | 3*        | -                                                                 | -           | -           | -        | -              | -                | -           | -             | -     | -        | -               | -    | -             | -        | -        | -    |              |
| 2016 Gewurztraminer | Floral     | 1         | 0.10                                                              | 0.19        | 0.06        | 39.87    | 0.16           | 0.02             | 30.70       | 2.79          | 5.05  | 12.37    | 1.06            | 0.15 | 7.24          | 0.06     | 0.02     | 0.14 |              |
|                     |            | 2         | 0.18                                                              | 0.19        | 0.06        | 38.63    | 0.14           | 0.01             | 29.72       | 3.22          | 5.47  | 13.90    | 1.15            | 0.16 | 6.93          | 0.07     | 0.03     | 0.14 |              |
|                     |            | 3         | 0.20                                                              | 0.19        | 0.06        | 41.24    | 0.12           | 0.01             | 29.51       | 2.79          | 4.15  | 12.50    | 1.47            | 0.16 | 7.36          | 0.07     | 0.04     | 0.14 |              |
| Muscat Gordo        | Floral     | 1         | 0.08                                                              | 0.01        | 0.07        | 46.25    | 0.02           | 0.00             | 26.09       | 0.32          | 4.23  | 22.44    | 0.06            | 0.00 | 0.43          | 0.00     | 0.00     | 0.00 |              |
|                     |            | 2         | 0.09                                                              | 0.01        | 0.09        | 49.48    | 0.02           | 0.00             | 25.35       | 0.35          | 3.91  | 20.20    | 0.07            | 0.00 | 0.44          | 0.00     | 0.01     | 0.00 |              |
|                     |            | 3         | 0.10                                                              | 0.01        | 0.10        | 48.80    | 0.02           | 0.00             | 26.11       | 0.32          | 3.81  | 20.24    | 0.06            | 0.00 | 0.41          | 0.00     | 0.01     | 0.00 |              |
| Muscat a PGB        | Floral     | 1         | 0.12                                                              | 0.02        | 0.14        | 52.54    | 0.08           | 0.01             | 32.64       | 0.32          | 4.15  | 9.10     | 0.11            | 0.02 | 0.74          | 0.01     | 0.00     | 0.01 |              |
|                     |            | 2         | 0.11                                                              | 0.02        | 0.12        | 52.54    | 0.07           | 0.01             | 32.43       | 0.36          | 4.12  | 9.41     | 0.09            | 0.01 | 0.69          | 0.01     | 0.00     | 0.01 |              |
|                     |            | 3         | 0.07                                                              | 0.02        | 0.08        | 54.33    | 0.07           | 0.01             | 30.62       | 0.38          | 3.97  | 9.65     | 0.09            | 0.02 | 0.67          | 0.00     | 0.00     | 0.01 |              |
| Riesling            | Floral     | 1         | 0.10                                                              | 0.05        | 0.06        | 50.11    | 0.01           | 0.00             | 30.79       | 0.71          | 3.61  | 8.51     | 0.93            | 0.04 | 5.00          | 0.02     | 0.04     | 0.02 |              |
|                     |            | 2         | 0.09                                                              | 0.06        | 0.08        | 51.19    | 0.01           | 0.00             | 32.47       | 0.90          | 2.41  | 6.64     | 1.05            | 0.05 | 4.94          | 0.02     | 0.04     | 0.05 |              |
|                     |            | 3*        | -                                                                 | -           | -           | -        | -              | -                | -           | -             | -     | -        | -               | -    | -             | -        | -        | -    |              |
| Gewurztraminer      | Floral     | 1         | 0.40                                                              | 0.36        | 0.11        | 32.22    | 1.00           | 0.14             | 30.75       | 5.34          | 3.63  | 10.32    | 1.38            | 0.30 | 13.57         | 0.13     | 0.09     | 0.27 |              |
|                     |            | 2         | 0.21                                                              | 0.37        | 0.11        | 32.15    | 0.92           | 0.13             | 30.64       | 5.98          | 3.48  | 10.05    | 1.51            | 0.30 | 13.65         | 0.13     | 0.09     | 0.27 |              |
|                     |            | 3         | 0.20                                                              | 0.36        | 0.11        | 31.73    | 1.07           | 0.16             | 30.68       | 7.68          | 3.86  | 10.23    | 1.47            | 0.30 | 11.86         | 0.12     | 0.05     | 0.12 |              |
| Viognier            | Floral     | 1         | 0.09                                                              | 0.05        | 0.06        | 52.30    | 0.03           | 0.01             | 31.44       | 1.17          | 3.42  | 8.85     | 0.23            | 0.04 | 2.24          | 0.02     | 0.03     | 0.02 |              |
|                     |            | 2         | 0.15                                                              | 0.07        | 0.10        | 51.73    | 0.03           | 0.01             | 30.49       | 1.07          | 3.46  | 10.12    | 0.28            | 0.06 | 2.35          | 0.03     | 0.03     | 0.02 |              |
|                     |            | 3         | 0.14                                                              | 0.07        | 0.10        | 51.54    | 0.04           | 0.00             | 31.29       | 1.64          | 3.64  | 9.00     | 0.30            | 0.06 | 2.06          | 0.03     | 0.04     | 0.05 |              |
| Cabernet Sauvignon  | Non-floral | 1         | 0.30                                                              | 0.54        | 0.70        | 17.09    | 0.06           | 0.01             | 22.36       | 7.42          | 2.84  | 7.00     | 2.57            | 0.45 | 38.03         | 0.19     | 0.04     | 0.40 |              |
|                     |            | 2         | 0.66                                                              | 0.60        | 0.18        | 17.80    | 0.06           | 0.01             | 25.09       | 8.17          | 3.17  | 7.48     | 2.61            | 0.50 | 33.08         | 0.05     | 0.10     | 0.44 |              |
|                     |            | 3         | 0.35                                                              | 0.62        | 0.19        | 19.68    | 0.07           | 0.01             | 26.49       | 8.75          | 3.26  | 7.09     | 2.93            | 0.51 | 29.25         | 0.21     | 0.14     | 0.46 |              |
| Chardonnay          | Non-floral | 1         | 0.26                                                              | 0.47        | 0.14        | 28.49    | 0.06           | 0.01             | 27.94       | 5.78          | 2.47  | 7.78     | 1.80            | 0.39 | 23.77         | 0.16     | 0.14     | 0.35 |              |
|                     |            | 2         | 0.28                                                              | 0.49        | 0.15        | 29.17    | 0.07           | 0.01             | 28.32       | 3.34          | 2.58  | 8.14     | 1.85            | 0.40 | 24.51         | 0.17     | 0.17     | 0.36 |              |
|                     |            | 3         | 0.47                                                              | 0.46        | 0.60        | 29.50    | 0.06           | 0.01             | 27.63       | 6.04          | 2.44  | 8.37     | 1.74            | 0.38 | 21.62         | 0.16     | 0.15     | 0.34 |              |
| Sauvignon Blanc     | Non-floral | 1         | 0.26                                                              | 0.47        | 0.14        | 23.06    | 0.10           | 0.03             | 26.47       | 5.33          | 2.48  | 7.69     | 2.96            | 0.39 | 29.92         | 0.16     | 0.20     | 0.35 |              |
|                     |            | 2         | 0.26                                                              | 0.45        | 0.14        | 20.81    | 0.10           | 0.01             | 26.27       | 6.95          | 2.39  | 7.19     | 2.96            | 0.37 | 31.45         | 0.16     | 0.17     | 0.33 |              |
|                     |            | 3         | 0.26                                                              | 0.47        | 0.14        | 22.15    | 0.12           | 0.03             | 25.86       | 6.38          | 2.45  | 7.29     | 3.06            | 0.38 | 30.79         | 0.16     | 0.11     | 0.34 |              |
| Semillon            | Non-floral | 1         | 0.28                                                              | 0.50        | 0.65        | 24.08    | 0.09           | 0.01             | 28.40       | 7.52          | 2.63  | 7.85     | 3.21            | 0.41 | 23.73         | 0.17     | 0.08     | 0.37 |              |
|                     |            | 2         | 0.31                                                              | 0.56        | 0.17        | 24.64    | 0.07           | 0.01             | 28.92       | 6.75          | 2.92  | 8.54     | 3.03            | 0.46 | 22.95         | 0.19     | 0.08     | 0.41 |              |
|                     |            | 3         | 0.31                                                              | 0.55        | 0.16        | 25.65    | 0.08           | 0.01             | 28.37       | 7.91          | 2.90  | 7.58     | 4.05            | 0.45 | 21.21         | 0.19     | 0.16     | 0.41 |              |
| Shiraz              | Non-floral | 1         | 0.35                                                              | 0.63        | 0.19        | 25.56    | 0.11           | 0.01             | 29.54       | 4.29          | 3.32  | 8.40     | 3.29            | 0.52 | 23.02         | 0.22     | 0.10     | 0.47 |              |
|                     |            | 2         | 0.37                                                              | 0.65        | 0.19        | 26.47    | 0.10           | 0.04             | 29.52       | 4.43          | 3.43  | 6.95     | 3.44            | 0.54 | 23.03         | 0.23     | 0.13     | 0.48 |              |
|                     |            | 3         | 0.35                                                              | 0.63        | 0.19        | 26.25    | 0.10           | 0.01             | 29.21       | 8.88          | 5.53  | 3.95     | 3.27            | 0.52 | 20.34         | 0.22     | 0.10     | 0.46 |              |
| Verdelho            | Non-floral | 1         | 0.37                                                              | 0.32        | 0.42        | 42.86    | 0.05           | 0.00             | 34.53       | 2.17          | 3.62  | 8.10     | 1.59            | 0.26 | 5.28          | 0.11     | 0.08     | 0.24 |              |
|                     |            | 2         | 0.31                                                              | 0.30        | 0.39        | 42.61    | 0.04           | 0.00             | 33.01       | 3.88          | 4.34  | 7.99     | 1.53            | 0.25 | 4.93          | 0.10     | 0.08     | 0.22 |              |
|                     |            | 3         | 0.32                                                              | 0.29        | 0.38        | 45.18    | 0.04           | 0.00             | 34.20       | 1.97          | 4.24  | 5.78     | 1.48            | 0.24 | 5.56          | 0.02     | 0.08     | 0.21 |              |

\* Analysis failed and provided no data.

Table S10: Concentration of selected monoterpenes and norisoprenoids in Chardonnay wine with 0.4 g/L additions of either floral or non-floral marc extracts, analysed after six-months of storage at 15 °C. Data expressed as mean of all replicates  $\pm$  standard deviation, with the ANOVA p-value and Tukey 95% honest significant difference (HSD) for each compound.

| Extract type  | Limonene        | Linalool            | cis-Rose oxide  | $\alpha$ -Terpineol | $\beta$ -Citronellol | Nerol             | Geraniol           | cis-Vitispirane | $\beta$ -Ionone | $\beta$ -Damascenone |
|---------------|-----------------|---------------------|-----------------|---------------------|----------------------|-------------------|--------------------|-----------------|-----------------|----------------------|
| Floral        | 0.91 $\pm$ 1.15 | 465.74 $\pm$ 638.77 | 0.38 $\pm$ 0.28 | 262.73 $\pm$ 340.7  | 4.89 $\pm$ 3.4       | 37.46 $\pm$ 53.18 | 163.08 $\pm$ 287.8 | 1.48 $\pm$ 0.91 | 0.09 $\pm$ 0.06 | 9.81 $\pm$ 4.47      |
| Non-floral    | 0.14 $\pm$ 0.04 | 11.38 $\pm$ 7.41    | 0.03 $\pm$ 0.01 | 11.3 $\pm$ 4.82     | 2.45 $\pm$ 0.84      | 1.29 $\pm$ 0.6    | 2.95 $\pm$ 0.94    | 0.93 $\pm$ 0.34 | 0.05 $\pm$ 0.02 | 7.91 $\pm$ 3.83      |
| p-value       | 0.0049          | 0.003               | <0.0001         | 0.0022              | 0.0037               | 0.0044            | 0.0175             | 0.0174          | 0.0082          | 0.1738               |
| Tukey 95% HSD | 0.52            | 289.26              | 0.13            | 154.29              | 1.59                 | 24.08             | 130.32             | 0.45            | 0.03            | 2.77                 |

Compounds not shown - terpinolene, *trans*-rose oxide, 1,8-cineole only quantifiable in floral samples; TDN,  $\alpha$ -ionone, wine lactone not quantifiable in any samples

Table S11: Mean concentration of most abundant monoterpenes in replicate wines resulting from addition of extracts. Data expressed as concentration as analysed in the wines; concentration above that present in the control wines; volatile concentration expressed as a weight-to-weight of the added extract.

| Sample             | Extract spike (g/L) | Mean concentration in in wine ( $\mu$ g/L)* |          |        |                     | Concentration in wine above control ( $\mu$ g/L) |          |        |                     | Concentration in wine ( $\mu$ g/g of extract) |          |        |                     |
|--------------------|---------------------|---------------------------------------------|----------|--------|---------------------|--------------------------------------------------|----------|--------|---------------------|-----------------------------------------------|----------|--------|---------------------|
|                    |                     | Geraniol                                    | Linalool | Nerol  | $\alpha$ -Terpineol | Geraniol                                         | Linalool | Nerol  | $\alpha$ -Terpineol | Geraniol                                      | Linalool | Nerol  | $\alpha$ -Terpineol |
| Control Wine       | N/A                 | 2.08                                        | 5.92     | 1.02   | 5.67                | -                                                | -        | -      | -                   | -                                             | -        | -      | -                   |
| Muscat a PGB       | 0.396               | 99.1                                        | 560.68   | 43.06  | 336.62              | 97.02                                            | 554.76   | 42.04  | 330.95              | 244.95                                        | 1400.64  | 106.14 | 835.57              |
| Viognier           | 0.405               | 28.21                                       | 158.29   | 10.65  | 94.91               | 26.13                                            | 152.37   | 9.63   | 89.24               | 64.52                                         | 376.25   | 23.78  | 220.36              |
| Riesling           | 0.402               | 26.99                                       | 177.61   | 10.82  | 110.72              | 24.91                                            | 171.69   | 9.80   | 105.05              | 61.90                                         | 426.64   | 24.35  | 261.04              |
| Muscat Gordo       | 0.402               | 760.18                                      | 1743.91  | 144.39 | 936.46              | 758.10                                           | 1737.99  | 143.37 | 930.79              | 1886.49                                       | 4324.88  | 356.77 | 2316.21             |
| Gerwurztraminer    | 0.396               | 5.44                                        | 17.08    | 1.95   | 16.36               | 3.36                                             | 11.16    | 0.93   | 10.69               | 8.48                                          | 28.16    | 2.35   | 26.97               |
| Chardonnay         | 0.400               | 3.31                                        | 11.88    | 1.02   | 11.43               | 1.23                                             | 5.96     | 0.00   | 5.76                | 3.08                                          | 14.90    | 0.00   | 14.40               |
| Semillon           | 0.404               | 4.65                                        | 27.91    | 2.61   | 21.72               | 2.57                                             | 21.99    | 1.59   | 16.05               | 6.36                                          | 54.42    | 3.93   | 39.72               |
| Verdelho           | 0.402               | 3.09                                        | 9.2      | 1.02   | 10.96               | 1.01                                             | 3.28     | 0.00   | 5.29                | 2.51                                          | 8.16     | 0.00   | 13.17               |
| Sauvignon Blanc    | 0.399               | 1.96                                        | 7.95     | 1.25   | 8.97                | -0.12                                            | 2.03     | 0.23   | 3.30                | -0.30                                         | 5.08     | 0.58   | 8.26                |
| Shiraz             | 0.403               | 2.9                                         | 8.99     | 1.02   | 10.37               | 0.82                                             | 3.07     | 0.00   | 4.70                | 2.04                                          | 7.63     | 0.00   | 11.68               |
| Cabernet Sauvignon | 0.400               | 2.38                                        | 6.01     | 1.02   | 8.13                | 0.30                                             | 0.09     | 0.00   | 2.46                | 0.75                                          | 0.22     | 0.00   | 6.15                |

\* Mean of the replicates as shown in Table S8

Table S12: Mean concentration of bound and volatile monoterpenes from marc extracts, including sum of selected monoterpenes shown in this table and the correlation between the measures. Concentration data are repeated or aggregated from previous tables for clarity.

| Sample                               | Concentration (µg/g of extract) |                            |             |                  |                                                          |          |        |             |                  |
|--------------------------------------|---------------------------------|----------------------------|-------------|------------------|----------------------------------------------------------|----------|--------|-------------|------------------|
|                                      | In extract                      | From hydrolysis of extract |             |                  | Evolving after storage of extract in wine for six months |          |        |             |                  |
|                                      | Geraniol glucoside              | Linalool                   | α-Terpineol | Sum <sup>#</sup> | Geraniol                                                 | Linalool | Nerol  | α-Terpineol | Sum <sup>#</sup> |
| Muscat a PGB                         | 1200.99                         | 437.6                      | 766.5       | 1204.0           | 244.95                                                   | 1400.64  | 106.14 | 835.57      | 2587.31          |
| Viognier                             | 216.66                          | 90.5                       | 118.3       | 208.9            | 64.52                                                    | 376.25   | 23.78  | 220.36      | 684.92           |
| Riesling                             | 185.66                          | 213.8                      | 256.6       | 470.5            | 61.90                                                    | 426.64   | 24.35  | 261.04      | 773.93           |
| Muscat Gordo                         | 2082.21                         | 1909.0                     | 1677.2      | 3586.2           | 1886.49                                                  | 4324.88  | 356.77 | 2316.21     | 8884.35          |
| Gerwurztraminer                      | 1305.81                         | 161.2                      | 153.3       | 314.5            | 8.48                                                     | 28.16    | 2.35   | 26.97       | 65.95            |
| Chardonnay                           | 2.36*                           | 13.1                       | 20.1        | 33.3             | 3.08                                                     | 14.90    | 0.00   | 14.40       | 32.38            |
| Semillon                             | 44.60                           | 62.8                       | 43.3        | 106.1            | 6.36                                                     | 54.42    | 3.93   | 39.72       | 104.44           |
| Verdelho                             | 27.43                           | 69.5                       | 48.9        | 118.4            | 2.51                                                     | 8.16     | 0.00   | 13.17       | 23.85            |
| Sauvignon Blanc                      | 85.00                           | 111.9                      | 78.8        | 190.6            | 0.00 <sup>^</sup>                                        | 5.08     | 0.58   | 8.26        | 13.92            |
| Shiraz                               | 93.33                           | 34.5                       | 30.8        | 65.3             | 2.04                                                     | 7.63     | 0.00   | 11.68       | 21.34            |
| Cabernet Sauvignon                   | 12.51*                          | 35.0                       | 26.7        | 61.7             | 0.75                                                     | 0.22     | 0.00   | 6.15        | 7.12             |
| Pearson correlation coefficients (R) |                                 |                            |             |                  |                                                          |          |        |             |                  |
| Extract                              | Geraniol glucoside              | 0.837                      | 0.875       | 0.861            | 0.792                                                    | 0.831    | 0.831  | 0.836       | 0.827            |
| Hydrolysis                           | Linalool                        |                            | 0.974       | 0.994            | 0.994                                                    | 0.989    | 0.992  | 0.984       | 0.992            |
|                                      | α-Terpineol                     |                            |             | 0.993            | 0.951                                                    | 0.99     | 0.987  | 0.993       | 0.986            |
|                                      | Sum                             |                            |             |                  | 0.98                                                     | 0.996    | 0.996  | 0.995       | 0.996            |
|                                      | Geraniol                        |                            |             |                  |                                                          | 0.981    | 0.986  | 0.973       | 0.987            |
| In bottle                            | Linalool                        |                            |             |                  |                                                          |          | 0.999  | 0.999       | 0.999            |
|                                      | Nerol                           |                            |             |                  |                                                          |          |        | 0.998       | 1.000            |
|                                      | α-Terpineol                     |                            |             |                  |                                                          |          |        |             | 0.998            |

\* replaced by values representing the mean of the analytical LOQ and LOD, or LOD and zero

<sup>^</sup> geraniol in wine with Sauvignon Blanc extract was lower than the unspiked control wine

<sup>#</sup> sum of the monoterpenes shown in this table
